# Supplementary material for: Comparative Genomic and Phylogenetic Analysis of a Shiga Toxin Producing Shigella sonnei (STSS) Strain
Source: Front Cell Infect Microbiol. 2017 May 30;7:229. doi: 10.3389/fcimb.2017.00229 (PMC5447701; doi:10.3389/fcimb.2017.00229)
Supplement: Supplementary Table 3 — Detailed characteristics of S. sonnei strains used in the phylogenetic analysis including strain 75/02. [file Table3.XLSX]

## Sheet: Sheet1
File	SNP5.Seq	snp5.Class	Organism.Name	Strain	BioSample	BioProject	Assembly	Assembly.Level	RefSeq.FTP	GenBank.FTP	Class	Literature.Class	Representative
GCF_001688075	CGCGA	ClassI	Shigella sonnei	CDPH_C97	SAMN04440978	PRJNA300887	GCA_001688075.1	Scaffold	ftp://ftp.ncbi.nlm.nih.gov/genomes/all/GCF_001688075.1_ASM168807v1	ftp://ftp.ncbi.nlm.nih.gov/genomes/all/GCA_001688075.1_ASM168807v1	I	Historical isolate LinageI	Shigella sonnei str. CDPH_C97 (ClassI, n=1)
GCF_001688055	TACGA	ClassII	Shigella sonnei	CDPH_C80	SAMN04440970	PRJNA300887	GCA_001688055.1	Scaffold	ftp://ftp.ncbi.nlm.nih.gov/genomes/all/GCF_001688055.1_ASM168805v1	ftp://ftp.ncbi.nlm.nih.gov/genomes/all/GCA_001688055.1_ASM168805v1	II	Historical isolate LinageII	Shigella sonnei str. CDPH_C80 (ClassII, n=3)
GCF_001689215	TACGA	ClassII	Shigella sonnei	CDPH_C82	SAMN04440972	PRJNA300887	GCA_001689215.1	Scaffold	ftp://ftp.ncbi.nlm.nih.gov/genomes/all/GCF_001689215.1_ASM168921v1	ftp://ftp.ncbi.nlm.nih.gov/genomes/all/GCA_001689215.1_ASM168921v1	II	Historical isolate LinageII	Shigella sonnei str. CDPH_C80 (ClassII, n=3)
GCF_001689225	TACGA	ClassII	Shigella sonnei	CDPH_C88	SAMN04440975	PRJNA300887	GCA_001689225.1	Scaffold	ftp://ftp.ncbi.nlm.nih.gov/genomes/all/GCF_001689225.1_ASM168922v1	ftp://ftp.ncbi.nlm.nih.gov/genomes/all/GCA_001689225.1_ASM168922v1	II	Historical isolate LinageII	Shigella sonnei str. CDPH_C80 (ClassII, n=3)
GCF_001687685	TGTAA	ClassIIIb	Shigella sonnei	CDPH_C33	SAMN04440957	PRJNA300887	GCA_001687685.1	Scaffold	ftp://ftp.ncbi.nlm.nih.gov/genomes/all/GCF_001687685.1_ASM168768v1	ftp://ftp.ncbi.nlm.nih.gov/genomes/all/GCA_001687685.1_ASM168768v1	IIIb	Sf	Shigella sonnei str. CDPH_C33 (ClassIIIb, n=14)
GCF_001687705	TGTAA	ClassIIIb	Shigella sonnei	CDPH_C41	SAMN04440965	PRJNA300887	GCA_001687705.1	Scaffold	ftp://ftp.ncbi.nlm.nih.gov/genomes/all/GCF_001687705.1_ASM168770v1	ftp://ftp.ncbi.nlm.nih.gov/genomes/all/GCA_001687705.1_ASM168770v1	IIIb	Sf	Shigella sonnei str. CDPH_C33 (ClassIIIb, n=14)
GCF_001687755	TGTAA	ClassIIIb	Shigella sonnei	CDPH_C38	SAMN04440962	PRJNA300887	GCA_001687755.1	Scaffold	ftp://ftp.ncbi.nlm.nih.gov/genomes/all/GCF_001687755.1_ASM168775v1	ftp://ftp.ncbi.nlm.nih.gov/genomes/all/GCA_001687755.1_ASM168775v1	IIIb	Sf	Shigella sonnei str. CDPH_C33 (ClassIIIb, n=14)
GCF_001687785	TGTAA	ClassIIIb	Shigella sonnei	CDPH_C43	SAMN04440967	PRJNA300887	GCA_001687785.1	Scaffold	ftp://ftp.ncbi.nlm.nih.gov/genomes/all/GCF_001687785.1_ASM168778v1	ftp://ftp.ncbi.nlm.nih.gov/genomes/all/GCA_001687785.1_ASM168778v1	IIIb	Sf	Shigella sonnei str. CDPH_C33 (ClassIIIb, n=14)
GCF_001687795	TGTAA	ClassIIIb	Shigella sonnei	CDPH_C44	SAMN04440968	PRJNA300887	GCA_001687795.1	Scaffold	ftp://ftp.ncbi.nlm.nih.gov/genomes/all/GCF_001687795.1_ASM168779v1	ftp://ftp.ncbi.nlm.nih.gov/genomes/all/GCA_001687795.1_ASM168779v1	IIIb	Sf	Shigella sonnei str. CDPH_C33 (ClassIIIb, n=14)
GCF_001687985	TGTAA	ClassIIIb	Shigella sonnei	CDPH_C32	SAMN04440956	PRJNA300887	GCA_001687985.1	Scaffold	ftp://ftp.ncbi.nlm.nih.gov/genomes/all/GCF_001687985.1_ASM168798v1	ftp://ftp.ncbi.nlm.nih.gov/genomes/all/GCA_001687985.1_ASM168798v1	IIIb	Sf	Shigella sonnei str. CDPH_C33 (ClassIIIb, n=14)
GCF_001687995	TGTAA	ClassIIIb	Shigella sonnei	CDPH_C35	SAMN04440959	PRJNA300887	GCA_001687995.1	Scaffold	ftp://ftp.ncbi.nlm.nih.gov/genomes/all/GCF_001687995.1_ASM168799v1	ftp://ftp.ncbi.nlm.nih.gov/genomes/all/GCA_001687995.1_ASM168799v1	IIIb	Sf	Shigella sonnei str. CDPH_C33 (ClassIIIb, n=14)
GCF_001688025	TGTAA	ClassIIIb	Shigella sonnei	CDPH_C37	SAMN04440961	PRJNA300887	GCA_001688025.1	Scaffold	ftp://ftp.ncbi.nlm.nih.gov/genomes/all/GCF_001688025.1_ASM168802v1	ftp://ftp.ncbi.nlm.nih.gov/genomes/all/GCA_001688025.1_ASM168802v1	IIIb	Sf	Shigella sonnei str. CDPH_C33 (ClassIIIb, n=14)
GCF_001688045	TGTAA	ClassIIIb	Shigella sonnei	CDPH_C40	SAMN04440964	PRJNA300887	GCA_001688045.1	Scaffold	ftp://ftp.ncbi.nlm.nih.gov/genomes/all/GCF_001688045.1_ASM168804v1	ftp://ftp.ncbi.nlm.nih.gov/genomes/all/GCA_001688045.1_ASM168804v1	IIIb	Sf	Shigella sonnei str. CDPH_C33 (ClassIIIb, n=14)
GCF_001688305	TGTAA	ClassIIIb	Shigella sonnei	CDPH_C36	SAMN04440960	PRJNA300887	GCA_001688305.1	Scaffold	ftp://ftp.ncbi.nlm.nih.gov/genomes/all/GCF_001688305.1_ASM168830v1	ftp://ftp.ncbi.nlm.nih.gov/genomes/all/GCA_001688305.1_ASM168830v1	IIIb	Sf	Shigella sonnei str. CDPH_C33 (ClassIIIb, n=14)
GCF_001688325	TGTAA	ClassIIIb	Shigella sonnei	CDPH_C39	SAMN04440963	PRJNA300887	GCA_001688325.1	Scaffold	ftp://ftp.ncbi.nlm.nih.gov/genomes/all/GCF_001688325.1_ASM168832v1	ftp://ftp.ncbi.nlm.nih.gov/genomes/all/GCA_001688325.1_ASM168832v1	IIIb	Sf	Shigella sonnei str. CDPH_C33 (ClassIIIb, n=14)
GCF_001688335	TGTAA	ClassIIIb	Shigella sonnei	CDPH_C42	SAMN04440966	PRJNA300887	GCA_001688335.1	Scaffold	ftp://ftp.ncbi.nlm.nih.gov/genomes/all/GCF_001688335.1_ASM168833v1	ftp://ftp.ncbi.nlm.nih.gov/genomes/all/GCA_001688335.1_ASM168833v1	IIIb	Sf_adjacent	Shigella sonnei str. CDPH_C33 (ClassIIIb, n=14)
GCF_001688365	TGTAA	ClassIIIb	Shigella sonnei	CDPH_C45	SAMN04440969	PRJNA300887	GCA_001688365.1	Scaffold	ftp://ftp.ncbi.nlm.nih.gov/genomes/all/GCF_001688365.1_ASM168836v1	ftp://ftp.ncbi.nlm.nih.gov/genomes/all/GCA_001688365.1_ASM168836v1	IIIb	Sf	Shigella sonnei str. CDPH_C33 (ClassIIIb, n=14)
GCF_001688485	TGTAA	ClassIIIb	Shigella sonnei	CDPH_C34	SAMN04440958	PRJNA300887	GCA_001688485.1	Scaffold	ftp://ftp.ncbi.nlm.nih.gov/genomes/all/GCF_001688485.1_ASM168848v1	ftp://ftp.ncbi.nlm.nih.gov/genomes/all/GCA_001688485.1_ASM168848v1	IIIb	Sf	Shigella sonnei str. CDPH_C33 (ClassIIIb, n=14)
GCA_001689195	TGTAG	ClassIIIc	Shigella sonnei	CDPH_C23	SAMN04440947	PRJNA300887	GCA_001689195.1	Scaffold	-	ftp://ftp.ncbi.nlm.nih.gov/genomes/all/GCA_001689195.1_ASM168919v1	III	SdSj	Shigella sonnei str. 75/02 (ClassIIIc, n=46)
GCF_001687825	TGTAG	ClassIIIc	Shigella sonnei	CDPH_C84	SAMN04440973	PRJNA300887	GCA_001687825.1	Scaffold	ftp://ftp.ncbi.nlm.nih.gov/genomes/all/GCF_001687825.1_ASM168782v1	ftp://ftp.ncbi.nlm.nih.gov/genomes/all/GCA_001687825.1_ASM168782v1	III	SdSj_adjacent	Shigella sonnei str. 75/02 (ClassIIIc, n=46)
GCF_001687865	TGTAG	ClassIIIc	Shigella sonnei	CDPH_C98	SAMN04440979	PRJNA300887	GCA_001687865.1	Scaffold	ftp://ftp.ncbi.nlm.nih.gov/genomes/all/GCF_001687865.1_ASM168786v1	ftp://ftp.ncbi.nlm.nih.gov/genomes/all/GCA_001687865.1_ASM168786v1	III	Historical isolate LinageIII	Shigella sonnei str. 75/02 (ClassIIIc, n=46)
GCF_001687875	TGTAG	ClassIIIc	Shigella sonnei	CDPH_C116	SAMN04440987	PRJNA300887	GCA_001687875.1	Scaffold	ftp://ftp.ncbi.nlm.nih.gov/genomes/all/GCF_001687875.1_ASM168787v1	ftp://ftp.ncbi.nlm.nih.gov/genomes/all/GCA_001687875.1_ASM168787v1	III	SdSj	Shigella sonnei str. 75/02 (ClassIIIc, n=46)
GCF_001687925	TGTAG	ClassIIIc	Shigella sonnei	CDPH_C125	SAMN04440994	PRJNA300887	GCA_001687925.1	Scaffold	ftp://ftp.ncbi.nlm.nih.gov/genomes/all/GCF_001687925.1_ASM168792v1	ftp://ftp.ncbi.nlm.nih.gov/genomes/all/GCA_001687925.1_ASM168792v1	III	SdSj	Shigella sonnei str. 75/02 (ClassIIIc, n=46)
GCF_001687935	TGTAG	ClassIIIc	Shigella sonnei	CDPH_C15	SAMN04440939	PRJNA300887	GCA_001687935.1	Scaffold	ftp://ftp.ncbi.nlm.nih.gov/genomes/all/GCF_001687935.1_ASM168793v1	ftp://ftp.ncbi.nlm.nih.gov/genomes/all/GCA_001687935.1_ASM168793v1	III	SdSj	Shigella sonnei str. 75/02 (ClassIIIc, n=46)
GCF_001688105	TGTAG	ClassIIIc	Shigella sonnei	CDPH_C31	SAMN04440955	PRJNA300887	GCA_001688105.1	Contig	ftp://ftp.ncbi.nlm.nih.gov/genomes/all/GCF_001688105.1_ASM168810v1	ftp://ftp.ncbi.nlm.nih.gov/genomes/all/GCA_001688105.1_ASM168810v1	III	SdSj	Shigella sonnei str. 75/02 (ClassIIIc, n=46)
GCF_001688135	TGTAG	ClassIIIc	Shigella sonnei	CDPH_C115	SAMN04440986	PRJNA300887	GCA_001688135.1	Scaffold	ftp://ftp.ncbi.nlm.nih.gov/genomes/all/GCF_001688135.1_ASM168813v1	ftp://ftp.ncbi.nlm.nih.gov/genomes/all/GCA_001688135.1_ASM168813v1	III	SdSj	Shigella sonnei str. 75/02 (ClassIIIc, n=46)
GCF_001688145	TGTAG	ClassIIIc	Shigella sonnei	CDPH_C114	SAMN04440985	PRJNA300887	GCA_001688145.1	Scaffold	ftp://ftp.ncbi.nlm.nih.gov/genomes/all/GCF_001688145.1_ASM168814v1	ftp://ftp.ncbi.nlm.nih.gov/genomes/all/GCA_001688145.1_ASM168814v1	III	SdSj	Shigella sonnei str. 75/02 (ClassIIIc, n=46)
GCF_001688185	TGTAG	ClassIIIc	Shigella sonnei	CDPH_C122	SAMN04440991	PRJNA300887	GCA_001688185.1	Scaffold	ftp://ftp.ncbi.nlm.nih.gov/genomes/all/GCF_001688185.1_ASM168818v1	ftp://ftp.ncbi.nlm.nih.gov/genomes/all/GCA_001688185.1_ASM168818v1	III	SdSj	Shigella sonnei str. 75/02 (ClassIIIc, n=46)
GCF_001688195	TGTAG	ClassIIIc	Shigella sonnei	CDPH_C124	SAMN04440993	PRJNA300887	GCA_001688195.1	Scaffold	ftp://ftp.ncbi.nlm.nih.gov/genomes/all/GCF_001688195.1_ASM168819v1	ftp://ftp.ncbi.nlm.nih.gov/genomes/all/GCA_001688195.1_ASM168819v1	III	SdSj	Shigella sonnei str. 75/02 (ClassIIIc, n=46)
GCF_001688235	TGTAG	ClassIIIc	Shigella sonnei	CDPH_C130	SAMN04440998	PRJNA300887	GCA_001688235.1	Scaffold	ftp://ftp.ncbi.nlm.nih.gov/genomes/all/GCF_001688235.1_ASM168823v1	ftp://ftp.ncbi.nlm.nih.gov/genomes/all/GCA_001688235.1_ASM168823v1	III	SdSj_adjacent	Shigella sonnei str. 75/02 (ClassIIIc, n=46)
GCF_001688265	TGTAG	ClassIIIc	Shigella sonnei	CDPH_C16	SAMN04440940	PRJNA300887	GCA_001688265.1	Scaffold	ftp://ftp.ncbi.nlm.nih.gov/genomes/all/GCF_001688265.1_ASM168826v1	ftp://ftp.ncbi.nlm.nih.gov/genomes/all/GCA_001688265.1_ASM168826v1	III	SdSj	Shigella sonnei str. 75/02 (ClassIIIc, n=46)
GCF_001688275	TGTAG	ClassIIIc	Shigella sonnei	CDPH_C19	SAMN04440943	PRJNA300887	GCA_001688275.1	Scaffold	ftp://ftp.ncbi.nlm.nih.gov/genomes/all/GCF_001688275.1_ASM168827v1	ftp://ftp.ncbi.nlm.nih.gov/genomes/all/GCA_001688275.1_ASM168827v1	III	SdSj	Shigella sonnei str. 75/02 (ClassIIIc, n=46)
GCF_001688385	TGTAG	ClassIIIc	Shigella sonnei	CDPH_C96	SAMN04440977	PRJNA300887	GCA_001688385.1	Contig	ftp://ftp.ncbi.nlm.nih.gov/genomes/all/GCF_001688385.1_ASM168838v1	ftp://ftp.ncbi.nlm.nih.gov/genomes/all/GCA_001688385.1_ASM168838v1	III	Historical isolate LinageIII	Shigella sonnei str. 75/02 (ClassIIIc, n=46)
GCF_001688395	TGTAG	ClassIIIc	Shigella sonnei	CDPH_C118	SAMN04440989	PRJNA300887	GCA_001688395.1	Scaffold	ftp://ftp.ncbi.nlm.nih.gov/genomes/all/GCF_001688395.1_ASM168839v1	ftp://ftp.ncbi.nlm.nih.gov/genomes/all/GCA_001688395.1_ASM168839v1	III	SdSj	Shigella sonnei str. 75/02 (ClassIIIc, n=46)
GCF_001688415	TGTAG	ClassIIIc	Shigella sonnei	CDPH_C119	SAMN04440990	PRJNA300887	GCA_001688415.1	Scaffold	ftp://ftp.ncbi.nlm.nih.gov/genomes/all/GCF_001688415.1_ASM168841v1	ftp://ftp.ncbi.nlm.nih.gov/genomes/all/GCA_001688415.1_ASM168841v1	III	SdSj	Shigella sonnei str. 75/02 (ClassIIIc, n=46)
GCF_001688445	TGTAG	ClassIIIc	Shigella sonnei	CDPH_C123	SAMN04440992	PRJNA300887	GCA_001688445.1	Scaffold	ftp://ftp.ncbi.nlm.nih.gov/genomes/all/GCF_001688445.1_ASM168844v1	ftp://ftp.ncbi.nlm.nih.gov/genomes/all/GCA_001688445.1_ASM168844v1	III	SdSj	Shigella sonnei str. 75/02 (ClassIIIc, n=46)
GCF_001688455	TGTAG	ClassIIIc	Shigella sonnei	CDPH_C126	SAMN04440995	PRJNA300887	GCA_001688455.1	Scaffold	ftp://ftp.ncbi.nlm.nih.gov/genomes/all/GCF_001688455.1_ASM168845v1	ftp://ftp.ncbi.nlm.nih.gov/genomes/all/GCA_001688455.1_ASM168845v1	III	SdSj	Shigella sonnei str. 75/02 (ClassIIIc, n=46)
GCF_001688475	TGTAG	ClassIIIc	Shigella sonnei	CDPH_C128	SAMN04440996	PRJNA300887	GCA_001688475.1	Scaffold	ftp://ftp.ncbi.nlm.nih.gov/genomes/all/GCF_001688475.1_ASM168847v1	ftp://ftp.ncbi.nlm.nih.gov/genomes/all/GCA_001688475.1_ASM168847v1	III	SdSj	Shigella sonnei str. 75/02 (ClassIIIc, n=46)
GCF_001688545	TGTAG	ClassIIIc	Shigella sonnei	CDPH_C9	SAMN04440933	PRJNA300887	GCA_001688545.1	Scaffold	ftp://ftp.ncbi.nlm.nih.gov/genomes/all/GCF_001688545.1_ASM168854v1	ftp://ftp.ncbi.nlm.nih.gov/genomes/all/GCA_001688545.1_ASM168854v1	III	SdSj	Shigella sonnei str. 75/02 (ClassIIIc, n=46)
GCF_001688555	TGTAG	ClassIIIc	Shigella sonnei	CDPH_C10	SAMN04440934	PRJNA300887	GCA_001688555.1	Scaffold	ftp://ftp.ncbi.nlm.nih.gov/genomes/all/GCF_001688555.1_ASM168855v1	ftp://ftp.ncbi.nlm.nih.gov/genomes/all/GCA_001688555.1_ASM168855v1	III	SdSj	Shigella sonnei str. 75/02 (ClassIIIc, n=46)
GCF_001688585	TGTAG	ClassIIIc	Shigella sonnei	CDPH_C11	SAMN04440935	PRJNA300887	GCA_001688585.1	Scaffold	ftp://ftp.ncbi.nlm.nih.gov/genomes/all/GCF_001688585.1_ASM168858v1	ftp://ftp.ncbi.nlm.nih.gov/genomes/all/GCA_001688585.1_ASM168858v1	III	SdSj	Shigella sonnei str. 75/02 (ClassIIIc, n=46)
GCF_001688605	TGTAG	ClassIIIc	Shigella sonnei	CDPH_C12	SAMN04440936	PRJNA300887	GCA_001688605.1	Scaffold	ftp://ftp.ncbi.nlm.nih.gov/genomes/all/GCF_001688605.1_ASM168860v1	ftp://ftp.ncbi.nlm.nih.gov/genomes/all/GCA_001688605.1_ASM168860v1	III	SdSj	Shigella sonnei str. 75/02 (ClassIIIc, n=46)
GCF_001688745	TGTAG	ClassIIIc	Shigella sonnei	CDPH_C13	SAMN04440937	PRJNA300887	GCA_001688745.1	Scaffold	ftp://ftp.ncbi.nlm.nih.gov/genomes/all/GCF_001688745.1_ASM168874v1	ftp://ftp.ncbi.nlm.nih.gov/genomes/all/GCA_001688745.1_ASM168874v1	III	SdSj	Shigella sonnei str. 75/02 (ClassIIIc, n=46)
GCF_001688755	TGTAG	ClassIIIc	Shigella sonnei	CDPH_C18	SAMN04440942	PRJNA300887	GCA_001688755.1	Scaffold	ftp://ftp.ncbi.nlm.nih.gov/genomes/all/GCF_001688755.1_ASM168875v1	ftp://ftp.ncbi.nlm.nih.gov/genomes/all/GCA_001688755.1_ASM168875v1	III	SdSj	Shigella sonnei str. 75/02 (ClassIIIc, n=46)
GCF_001688775	TGTAG	ClassIIIc	Shigella sonnei	CDPH_C14	SAMN04440938	PRJNA300887	GCA_001688775.1	Scaffold	ftp://ftp.ncbi.nlm.nih.gov/genomes/all/GCF_001688775.1_ASM168877v1	ftp://ftp.ncbi.nlm.nih.gov/genomes/all/GCA_001688775.1_ASM168877v1	III	SdSj	Shigella sonnei str. 75/02 (ClassIIIc, n=46)
GCF_001688785	TGTAG	ClassIIIc	Shigella sonnei	CDPH_C17	SAMN04440941	PRJNA300887	GCA_001688785.1	Scaffold	ftp://ftp.ncbi.nlm.nih.gov/genomes/all/GCF_001688785.1_ASM168878v1	ftp://ftp.ncbi.nlm.nih.gov/genomes/all/GCA_001688785.1_ASM168878v1	III	SdSj	Shigella sonnei str. 75/02 (ClassIIIc, n=46)
GCF_001688865	TGTAG	ClassIIIc	Shigella sonnei	CDPH_C26	SAMN04440950	PRJNA300887	GCA_001688865.1	Scaffold	ftp://ftp.ncbi.nlm.nih.gov/genomes/all/GCF_001688865.1_ASM168886v1	ftp://ftp.ncbi.nlm.nih.gov/genomes/all/GCA_001688865.1_ASM168886v1	III	SdSj	Shigella sonnei str. 75/02 (ClassIIIc, n=46)
GCF_001688875	TGTAG	ClassIIIc	Shigella sonnei	CDPH_C21	SAMN04440945	PRJNA300887	GCA_001688875.1	Scaffold	ftp://ftp.ncbi.nlm.nih.gov/genomes/all/GCF_001688875.1_ASM168887v1	ftp://ftp.ncbi.nlm.nih.gov/genomes/all/GCA_001688875.1_ASM168887v1	III	SdSj	Shigella sonnei str. 75/02 (ClassIIIc, n=46)
GCF_001688885	TGTAG	ClassIIIc	Shigella sonnei	CDPH_C27	SAMN04440951	PRJNA300887	GCA_001688885.1	Scaffold	ftp://ftp.ncbi.nlm.nih.gov/genomes/all/GCF_001688885.1_ASM168888v1	ftp://ftp.ncbi.nlm.nih.gov/genomes/all/GCA_001688885.1_ASM168888v1	III	SdSj	Shigella sonnei str. 75/02 (ClassIIIc, n=46)
GCF_001688975	TGTAG	ClassIIIc	Shigella sonnei	CDPH_C102	SAMN04440982	PRJNA300887	GCA_001688975.1	Scaffold	ftp://ftp.ncbi.nlm.nih.gov/genomes/all/GCF_001688975.1_ASM168897v1	ftp://ftp.ncbi.nlm.nih.gov/genomes/all/GCA_001688975.1_ASM168897v1	III	SdSj	Shigella sonnei str. 75/02 (ClassIIIc, n=46)
GCF_001689005	TGTAG	ClassIIIc	Shigella sonnei	CDPH_C24	SAMN04440948	PRJNA300887	GCA_001689005.1	Scaffold	ftp://ftp.ncbi.nlm.nih.gov/genomes/all/GCF_001689005.1_ASM168900v1	ftp://ftp.ncbi.nlm.nih.gov/genomes/all/GCA_001689005.1_ASM168900v1	III	SdSj	Shigella sonnei str. 75/02 (ClassIIIc, n=46)
GCF_001689015	TGTAG	ClassIIIc	Shigella sonnei	CDPH_C25	SAMN04440949	PRJNA300887	GCA_001689015.1	Scaffold	ftp://ftp.ncbi.nlm.nih.gov/genomes/all/GCF_001689015.1_ASM168901v1	ftp://ftp.ncbi.nlm.nih.gov/genomes/all/GCA_001689015.1_ASM168901v1	III	SdSj	Shigella sonnei str. 75/02 (ClassIIIc, n=46)
GCF_001689085	TGTAG	ClassIIIc	Shigella sonnei	CDPH_C28	SAMN04440952	PRJNA300887	GCA_001689085.1	Scaffold	ftp://ftp.ncbi.nlm.nih.gov/genomes/all/GCF_001689085.1_ASM168908v1	ftp://ftp.ncbi.nlm.nih.gov/genomes/all/GCA_001689085.1_ASM168908v1	III	SdSj	Shigella sonnei str. 75/02 (ClassIIIc, n=46)
GCF_001689095	TGTAG	ClassIIIc	Shigella sonnei	CDPH_C29	SAMN04440953	PRJNA300887	GCA_001689095.1	Scaffold	ftp://ftp.ncbi.nlm.nih.gov/genomes/all/GCF_001689095.1_ASM168909v1	ftp://ftp.ncbi.nlm.nih.gov/genomes/all/GCA_001689095.1_ASM168909v1	III	SdSj	Shigella sonnei str. 75/02 (ClassIIIc, n=46)
GCF_001689145	TGTAG	ClassIIIc	Shigella sonnei	CDPH_C7	SAMN04440931	PRJNA300887	GCA_001689145.1	Scaffold	ftp://ftp.ncbi.nlm.nih.gov/genomes/all/GCF_001689145.1_ASM168914v1	ftp://ftp.ncbi.nlm.nih.gov/genomes/all/GCA_001689145.1_ASM168914v1	III	SdSj	Shigella sonnei str. 75/02 (ClassIIIc, n=46)
GCF_001689185	TGTAG	ClassIIIc	Shigella sonnei	CDPH_C22	SAMN04440946	PRJNA300887	GCA_001689185.1	Scaffold	ftp://ftp.ncbi.nlm.nih.gov/genomes/all/GCF_001689185.1_ASM168918v1	ftp://ftp.ncbi.nlm.nih.gov/genomes/all/GCA_001689185.1_ASM168918v1	III	SdSj	Shigella sonnei str. 75/02 (ClassIIIc, n=46)
GCF_001689265	TGTAG	ClassIIIc	Shigella sonnei	CDPH_C101	SAMN04440981	PRJNA300887	GCA_001689265.1	Scaffold	ftp://ftp.ncbi.nlm.nih.gov/genomes/all/GCF_001689265.1_ASM168926v1	ftp://ftp.ncbi.nlm.nih.gov/genomes/all/GCA_001689265.1_ASM168926v1	III	SdSj	Shigella sonnei str. 75/02 (ClassIIIc, n=46)
GCF_001689285	TGTAG	ClassIIIc	Shigella sonnei	CDPH_C112	SAMN04440983	PRJNA300887	GCA_001689285.1	Scaffold	ftp://ftp.ncbi.nlm.nih.gov/genomes/all/GCF_001689285.1_ASM168928v1	ftp://ftp.ncbi.nlm.nih.gov/genomes/all/GCA_001689285.1_ASM168928v1	III	SdSj	Shigella sonnei str. 75/02 (ClassIIIc, n=46)
GCF_001689295	TGTAG	ClassIIIc	Shigella sonnei	CDPH_C113	SAMN04440984	PRJNA300887	GCA_001689295.1	Scaffold	ftp://ftp.ncbi.nlm.nih.gov/genomes/all/GCF_001689295.1_ASM168929v1	ftp://ftp.ncbi.nlm.nih.gov/genomes/all/GCA_001689295.1_ASM168929v1	III	SdSj	Shigella sonnei str. 75/02 (ClassIIIc, n=46)
GCF_001689325	TGTAG	ClassIIIc	Shigella sonnei	CDPH_C8	SAMN04440932	PRJNA300887	GCA_001689325.1	Scaffold	ftp://ftp.ncbi.nlm.nih.gov/genomes/all/GCF_001689325.1_ASM168932v1	ftp://ftp.ncbi.nlm.nih.gov/genomes/all/GCA_001689325.1_ASM168932v1	III	SdSj	Shigella sonnei str. 75/02 (ClassIIIc, n=46)
GCF_001689345	TGTAG	ClassIIIc	Shigella sonnei	CDPH_C30	SAMN04440954	PRJNA300887	GCA_001689345.1	Scaffold	ftp://ftp.ncbi.nlm.nih.gov/genomes/all/GCF_001689345.1_ASM168934v1	ftp://ftp.ncbi.nlm.nih.gov/genomes/all/GCA_001689345.1_ASM168934v1	III	SdSj	Shigella sonnei str. 75/02 (ClassIIIc, n=46)
GCF_001689355	TGTAG	ClassIIIc	Shigella sonnei	CDPH_C129	SAMN04440997	PRJNA300887	GCA_001689355.1	Scaffold	ftp://ftp.ncbi.nlm.nih.gov/genomes/all/GCF_001689355.1_ASM168935v1	ftp://ftp.ncbi.nlm.nih.gov/genomes/all/GCA_001689355.1_ASM168935v1	III	SdSj	Shigella sonnei str. 75/02 (ClassIIIc, n=46)
GCF_001689365	TGTAG	ClassIIIc	Shigella sonnei	CDPH_C117	SAMN04440988	PRJNA300887	GCA_001689365.1	Scaffold	ftp://ftp.ncbi.nlm.nih.gov/genomes/all/GCF_001689365.1_ASM168936v1	ftp://ftp.ncbi.nlm.nih.gov/genomes/all/GCA_001689365.1_ASM168936v1	III	SdSj	Shigella sonnei str. 75/02 (ClassIIIc, n=46)
75/02	TGTAG	ClassIIIc	Shigella sonnei 75/02	75/02	SAMN06286561	PRJNA369464		Complete Genome			NA	NA	Shigella sonnei str. 75/02 (ClassIIIc, n=46)
GCF_001687965	TGTGA	ClassIIIa	Shigella sonnei	CDPH_C81	SAMN04440971	PRJNA300887	GCA_001687965.1	Scaffold	ftp://ftp.ncbi.nlm.nih.gov/genomes/all/GCF_001687965.1_ASM168796v1	ftp://ftp.ncbi.nlm.nih.gov/genomes/all/GCA_001687965.1_ASM168796v1	IIIa	Historical isolate LinageIII	Shigella sonnei str. CDPH_C81 (ClassIIIa, n=4)
GCF_001688115	TGTGA	ClassIIIa	Shigella sonnei	CDPH_C99	SAMN04440980	PRJNA300887	GCA_001688115.1	Contig	ftp://ftp.ncbi.nlm.nih.gov/genomes/all/GCF_001688115.1_ASM168811v1	ftp://ftp.ncbi.nlm.nih.gov/genomes/all/GCA_001688115.1_ASM168811v1	IIIa	Historical isolate LinageIII	Shigella sonnei str. CDPH_C81 (ClassIIIa, n=4)
GCF_001688895	TGTGA	ClassIIIa	Shigella sonnei	CDPH_C85	SAMN04440974	PRJNA300887	GCA_001688895.1	Contig	ftp://ftp.ncbi.nlm.nih.gov/genomes/all/GCF_001688895.1_ASM168889v1	ftp://ftp.ncbi.nlm.nih.gov/genomes/all/GCA_001688895.1_ASM168889v1	IIIa	Historical isolate LinageIII	Shigella sonnei str. CDPH_C81 (ClassIIIa, n=4)
GCF_001689105	TGTGA	ClassIIIa	Shigella sonnei	CDPH_C92	SAMN04440976	PRJNA300887	GCA_001689105.1	Scaffold	ftp://ftp.ncbi.nlm.nih.gov/genomes/all/GCF_001689105.1_ASM168910v1	ftp://ftp.ncbi.nlm.nih.gov/genomes/all/GCA_001689105.1_ASM168910v1	IIIa	Historical isolate LinageIII	Shigella sonnei str. CDPH_C81 (ClassIIIa, n=4)
